# Supplementary material for: Lei’s formula attenuates osteoarthritis mediated by suppression of chondrocyte senescence via the mTOR axis: in vitro and in vivo experiments
Source: publisher site journal article supplement (doi:10.18632/aging.205582), 2024-02-23
Supplement: Supplementary file [file aging-v16i5-205582-supplementary-material-SD1.pdf]

## SUPPLEMENTARY FIGURE

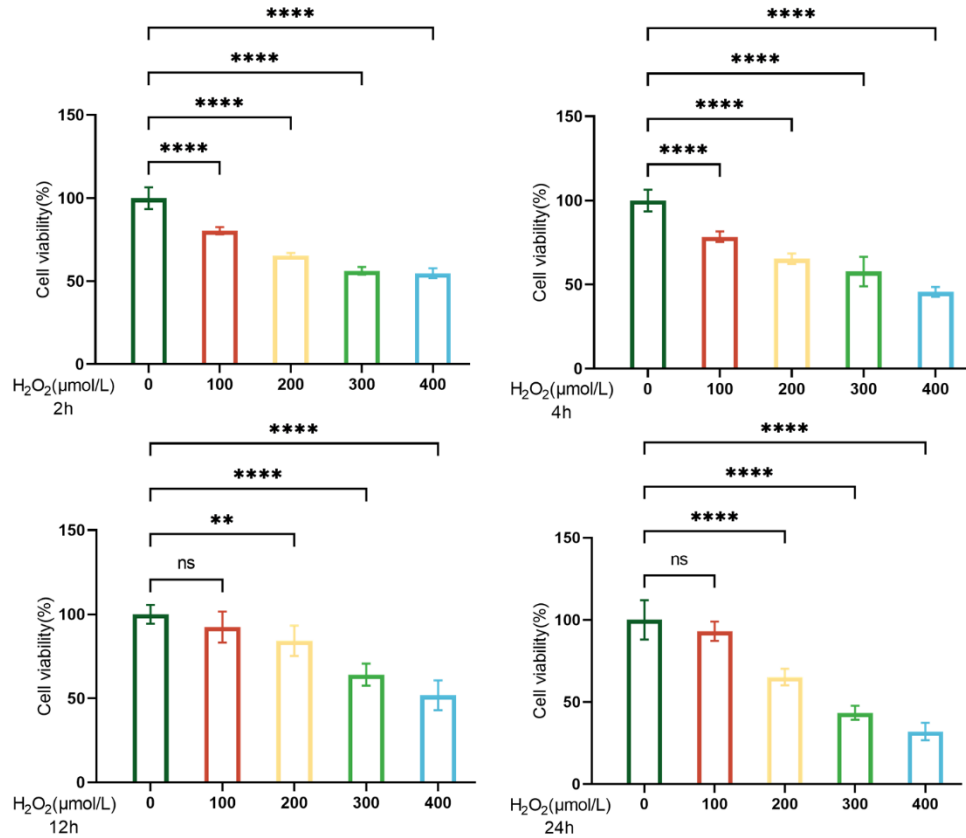

**Supplementary Figure 1. Screening of H<sub>2</sub>O<sub>2</sub>-stimulated cellular oxidative stress model for optimal dose and duration of action.** Different concentrations of H<sub>2</sub>O<sub>2</sub> (0, 100, 200, 300, and 400 μM) stimulated the cells for 2h, 4h, 12h, and 24h, respectively, and it was observed that the cell viability was maintained at about 60%-70% at the concentration of 200 μM of H<sub>2</sub>O<sub>2</sub>, which could be used as the subsequent intervention concentration, as detected by CCK8.
